# Supplementary material
Source: PubMed Central journal article supplement (PMC7526000)
Supplement: 12911_2020_1266_MOESM3_ESM.pdf [file 12911_2020_1266_MOESM3_ESM.pdf]

**Table S3: p-values of Kruskal-Wallis Tests across Superclusters**

|    |                                   |            |
|----|-----------------------------------|------------|
| 1  | Age                               | 4.18E-24   |
| 2  | Sex                               | 6.76E-11   |
| 3  | Region                            | 0.00464726 |
| 4  | Neutrophil Levels                 | 2.62E-26   |
| 5  | Serum Levels of WBC               | 1.04E-29   |
| 6  | Lymphocytes                       | 2.61E-44   |
| 7  | Lymphocyte Levels                 | 1.12E-40   |
| 8  | C Reactive Protein Levels         | 1.34E-31   |
| 9  | C Reactive Protein High or Low    | 5.41E-32   |
| 10 | Duration of Illness               | 6.64E-09   |
| 11 | Days to Death                     | 0.06458636 |
| 12 | CT Scan Results                   | 1.50E-17   |
| 13 | RT PCR results                    | 2.88E-10   |
| 14 | Risk Factors                      | 1.88E-10   |
| 15 | Smoking                           | 1.72E-06   |
| 16 | Ground Glass Opacity              | 2.66E-15   |
| 17 | Incubation before symptoms appear | 0.81403554 |
| 18 | Fever                             | 3.58E-16   |
| 19 | Coughing                          | 3.80E-20   |
| 20 | Shortness of Breath               | 4.18E-26   |
| 21 | Sore Throat                       | 7.88E-30   |
| 22 | Nausea and Vomiting               | 0.01510208 |
| 23 | Pregnant                          | 5.64E-48   |
| 24 | If pregnant did baby die          | 2.83E-44   |
| 25 | If pregnant Premature Delivery    | 1.83E-21   |
| 26 | Body Temperature                  | 3.96E-06   |
| 27 | Cancer                            | 0.05768527 |
