# Supplementary material
Source: PubMed Central journal article supplement (PMC7526000)

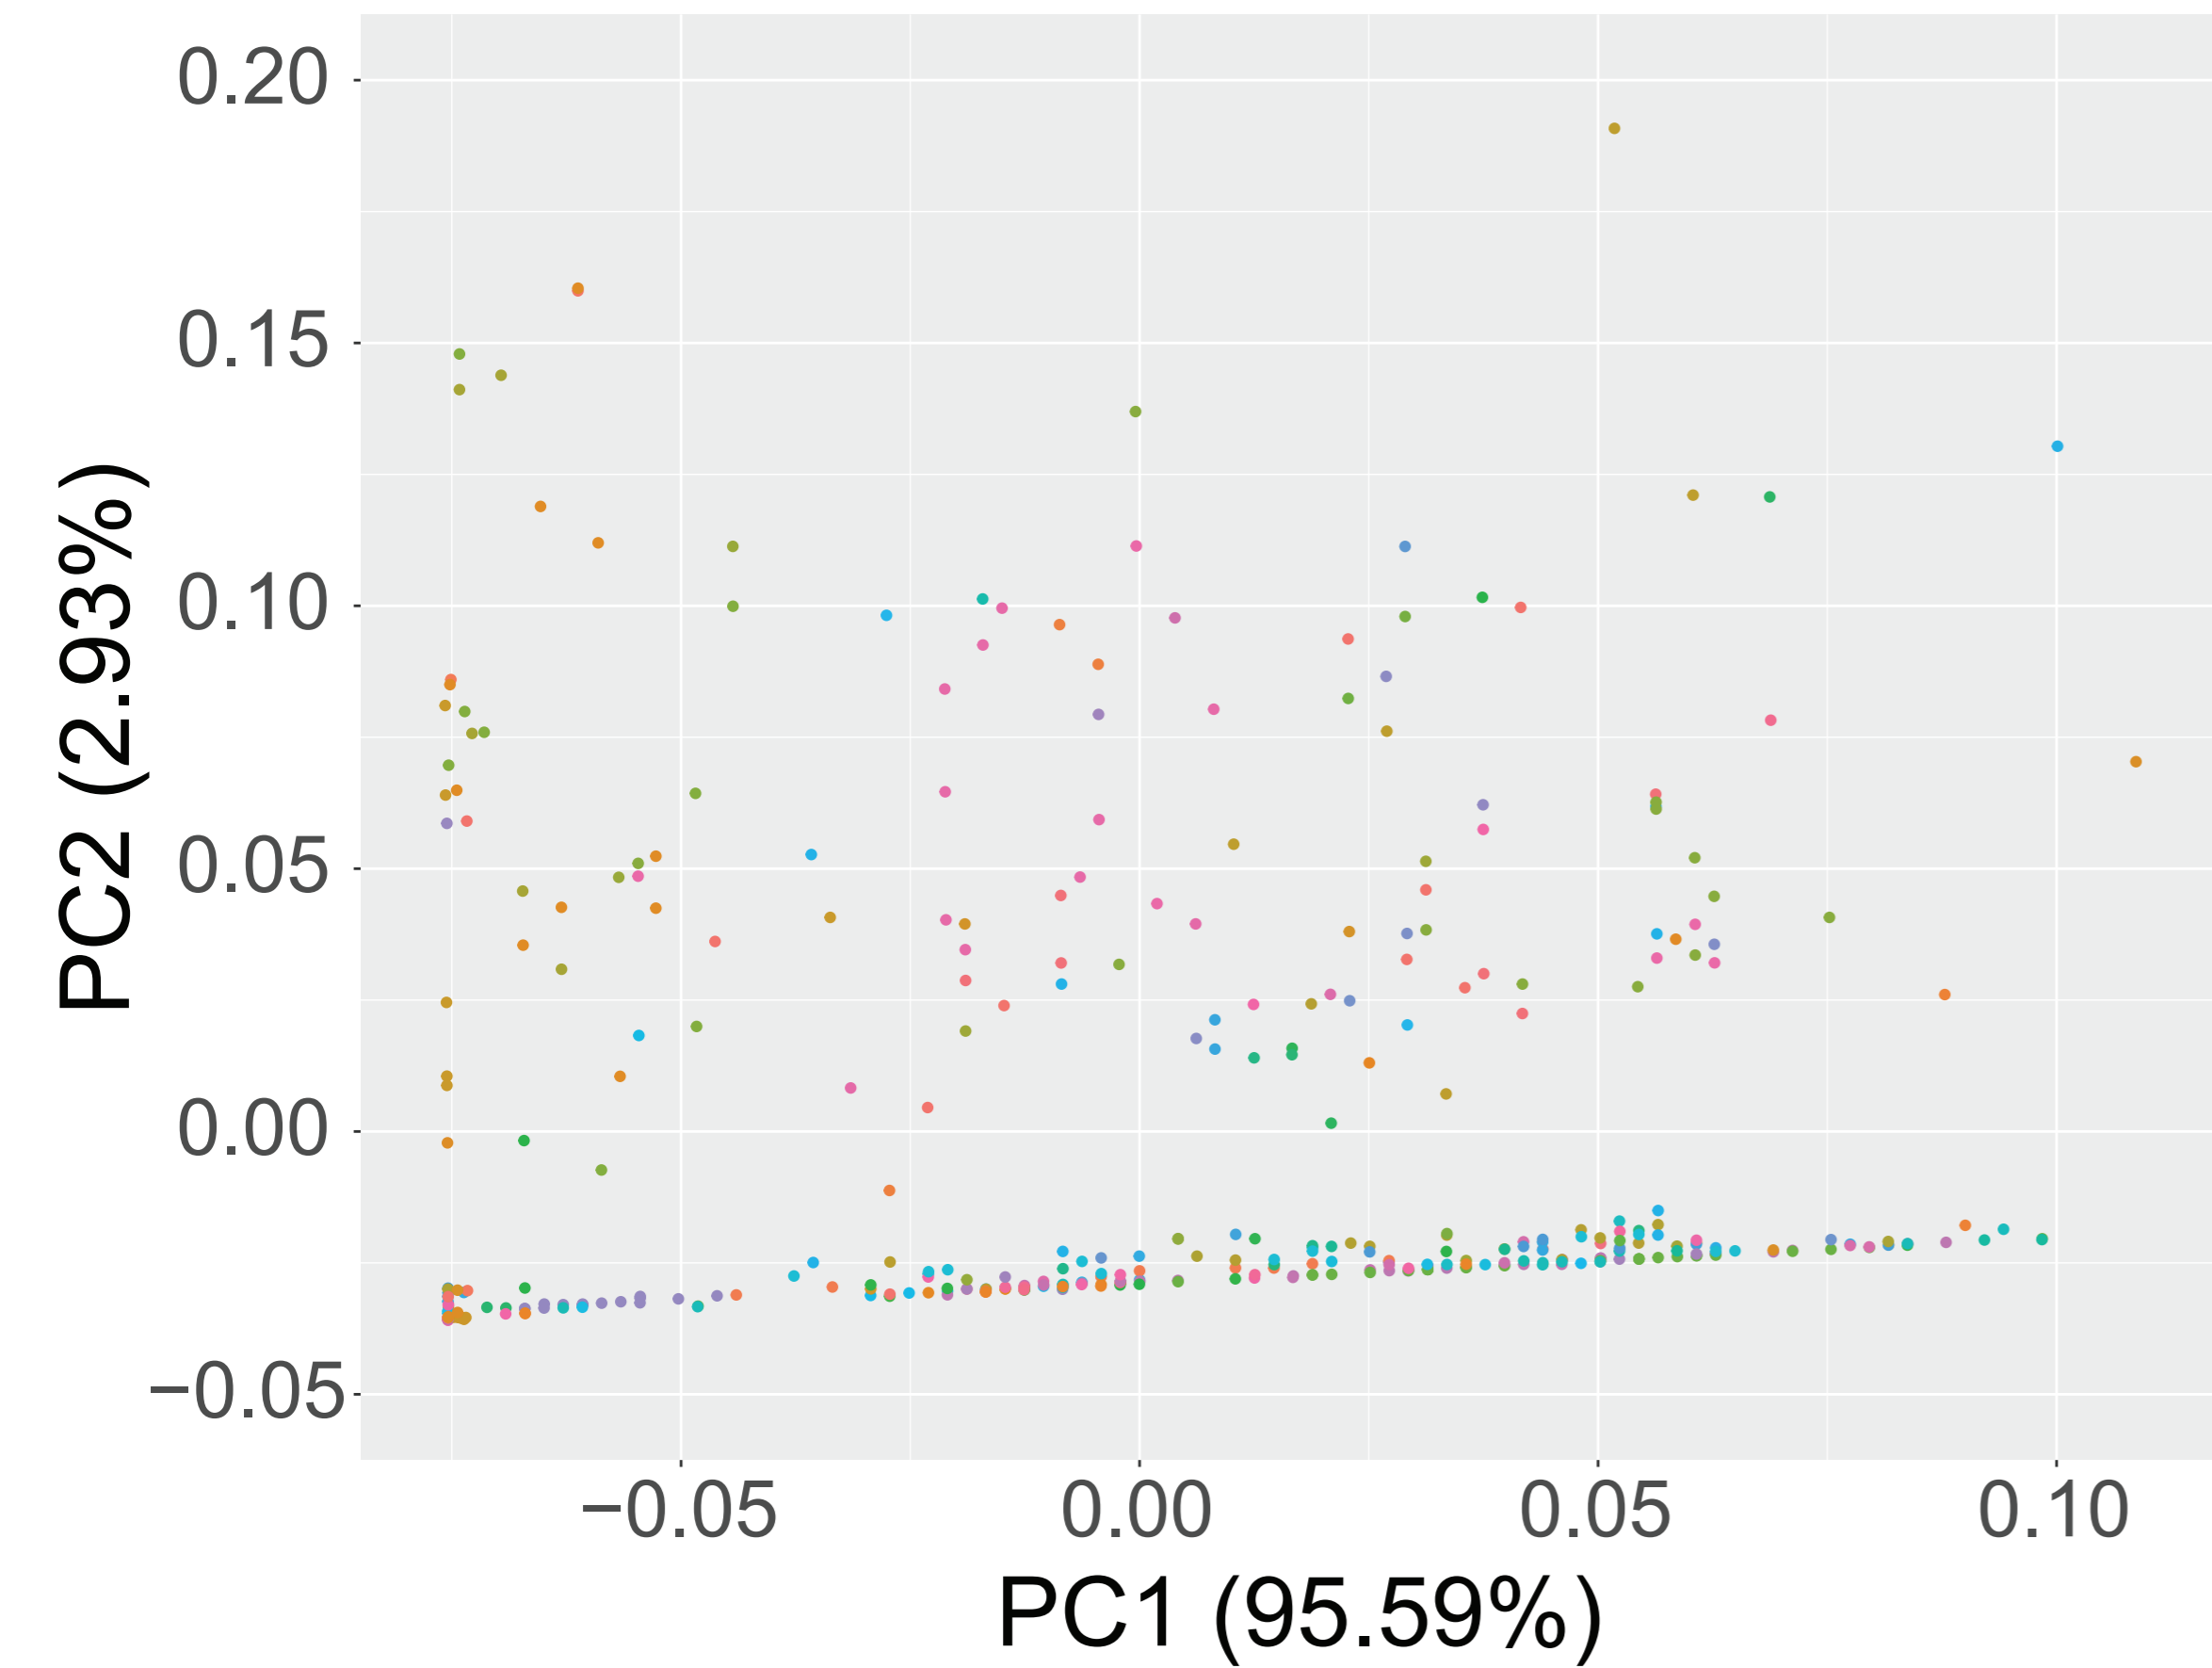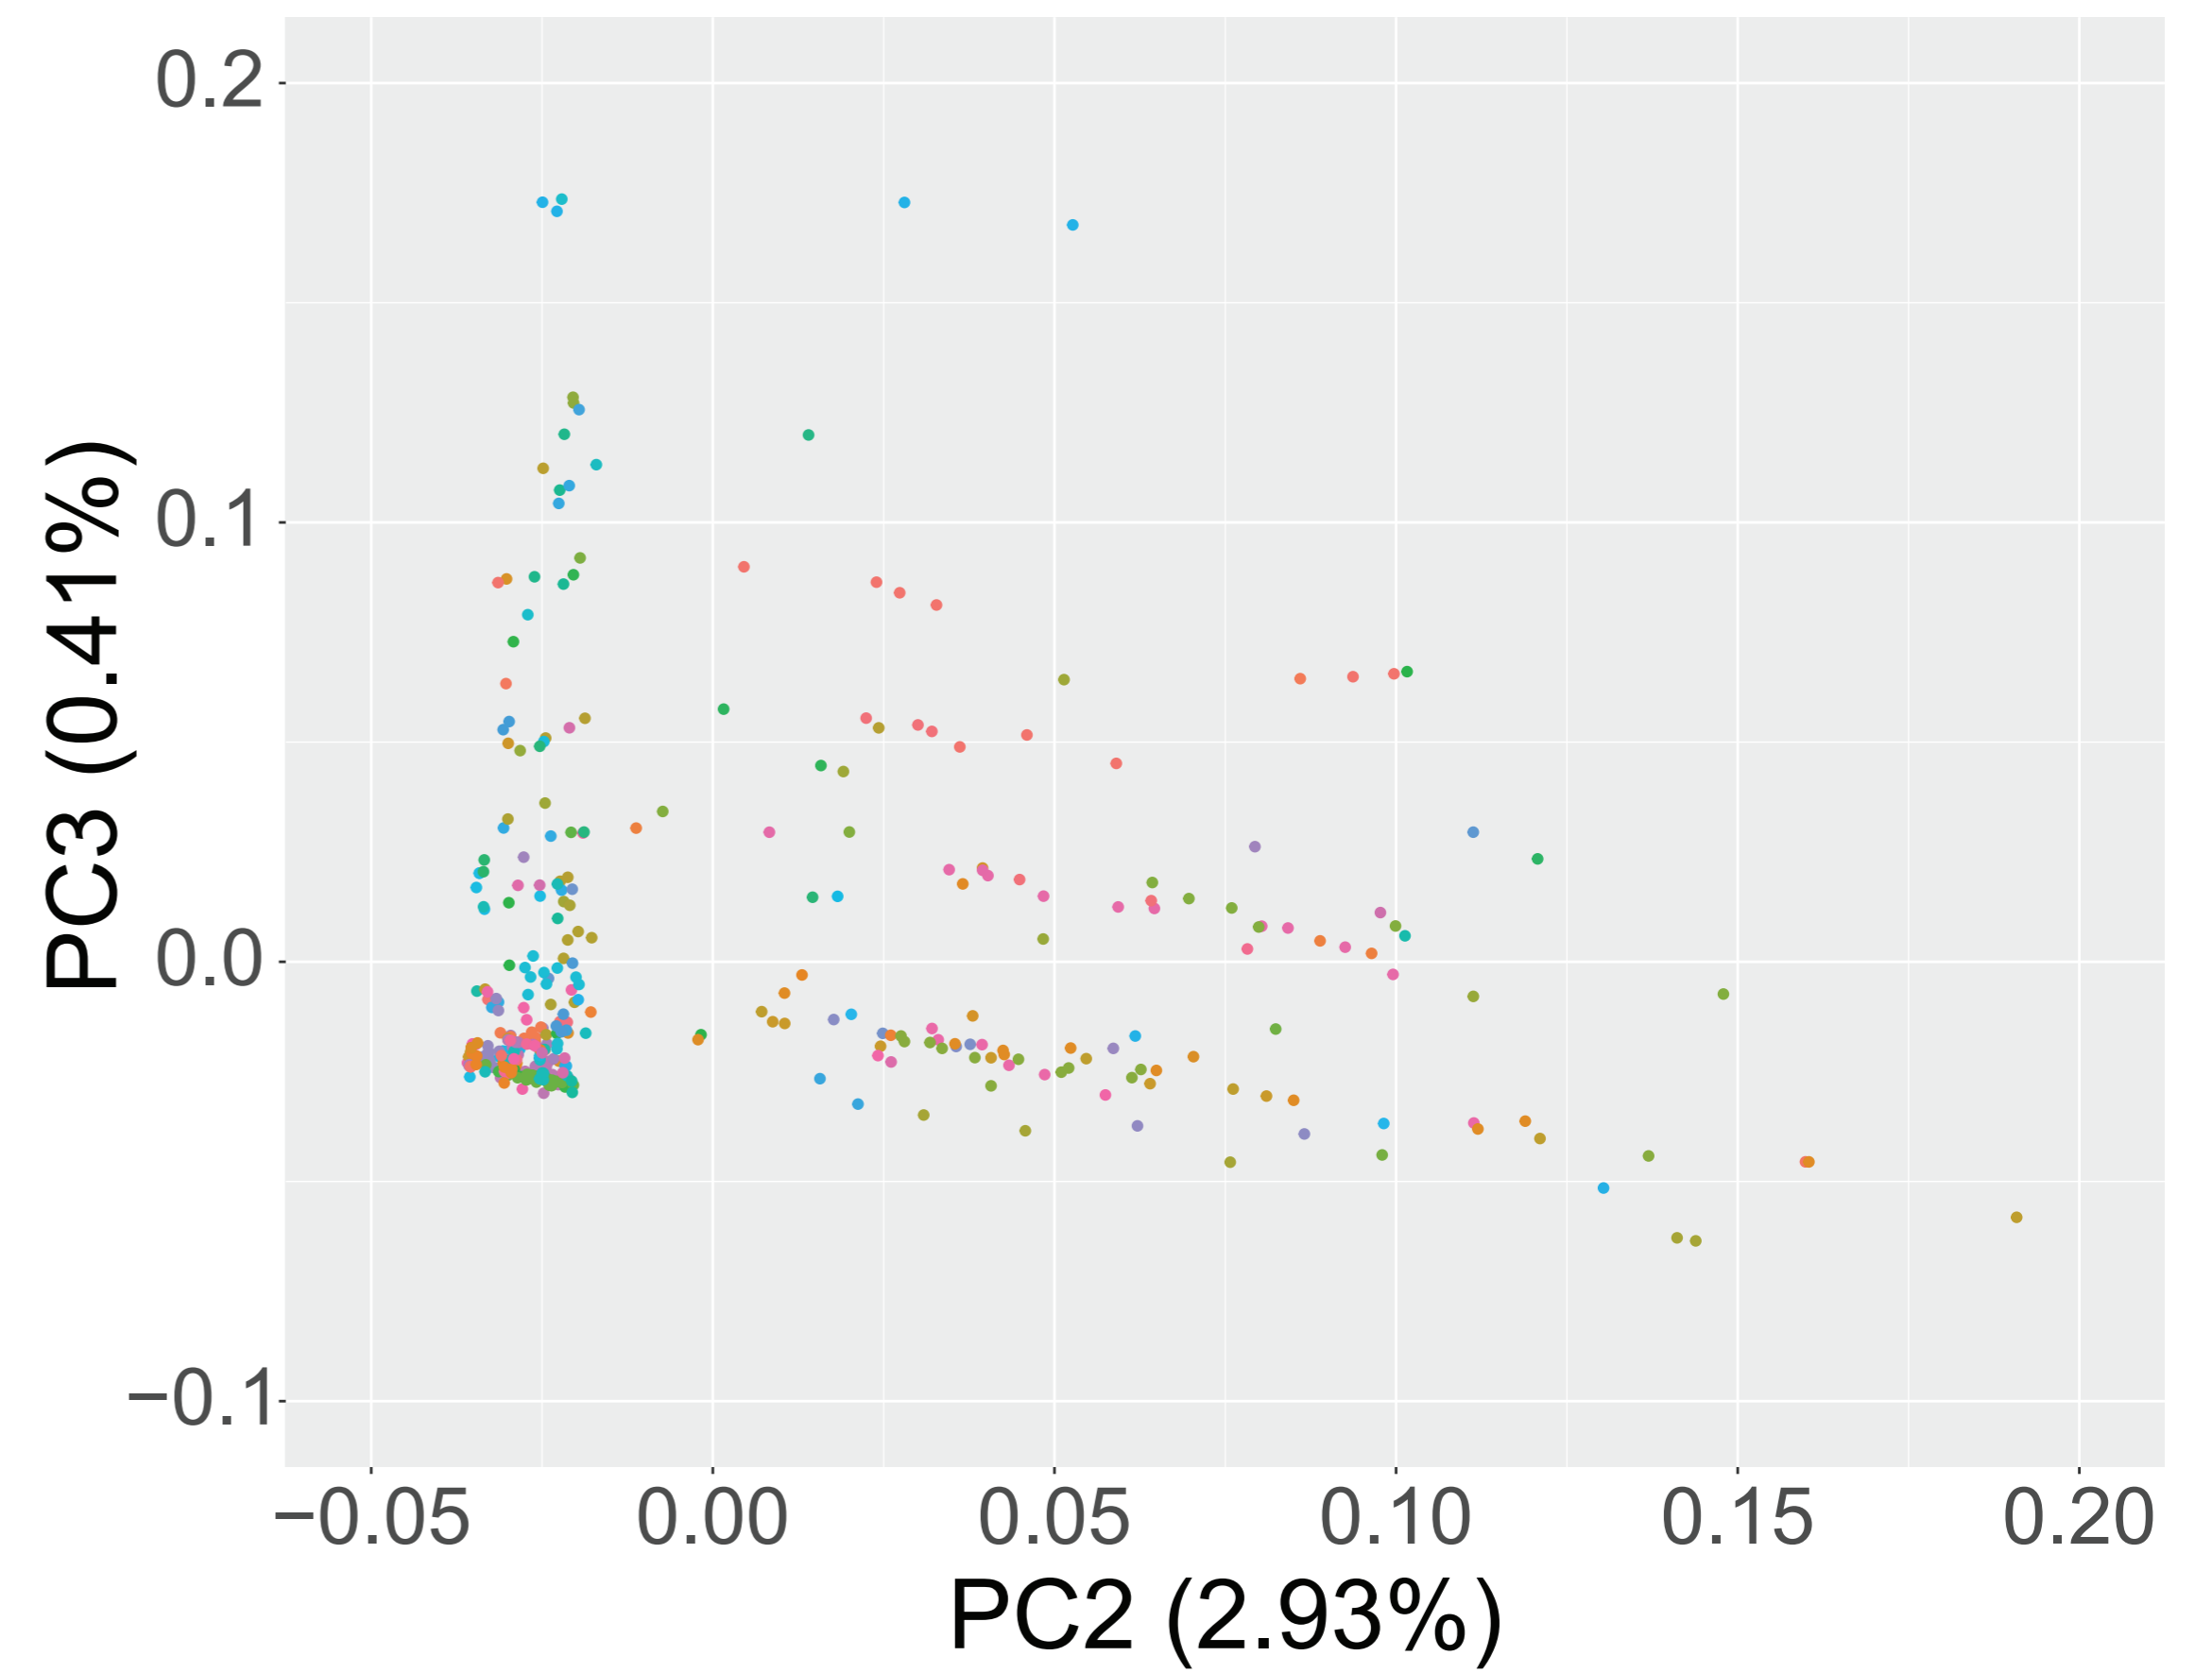

Supplement: 12911_2020_1266_MOESM5_ESM.pdf [file 12911_2020_1266_MOESM5_ESM.pdf]
